# Supplementary material
Source: PubMed Central journal article supplement (PMC3069171)
Supplement: 1017539108_pnas.201017539SI.pdf [file 1017539108_pnas.201017539SI.pdf]

# Supporting Information

Jorge et al. 10.1073/pnas.1017539108

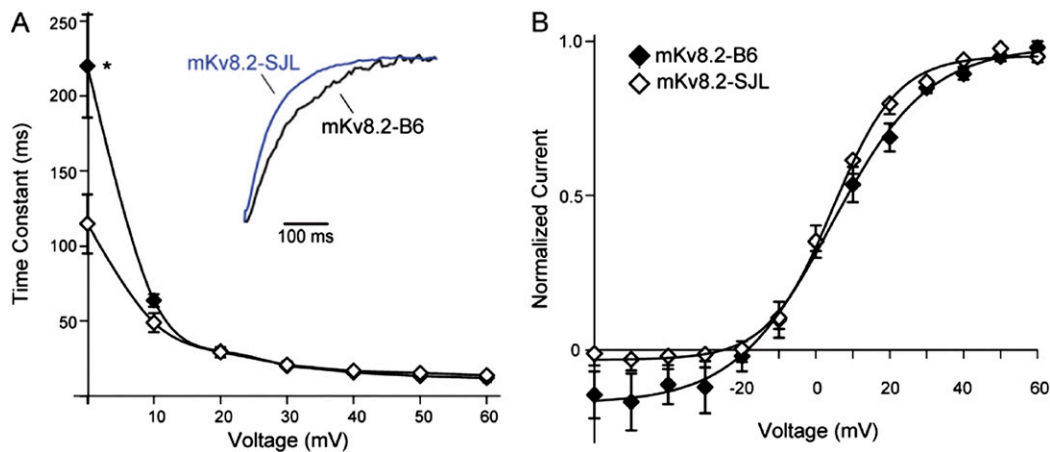

**Fig. S1.** Biophysical properties of mKv2.1 channels coexpressed with mKv8.2 subunits. (A) Voltage dependence of activation time constants for mKv2.1 coexpressed with Kv8.2 isoforms ( $*P < 0.05$  compared with WT). Time constants were determined from monoexponential fits to the data. Currents recorded at voltages  $< 0$  mV were too small to determine time constants. *Inset:* Averaged current traces (blue, mKv2.1 + SJL-Kv8.2; black, mKv2.1 + B6-Kv8.2) recorded from 10 to 500 ms after a test pulse to 0 mV and normalized to current amplitude measured at 500 ms. (B) Voltage dependence of steady-state activation. Tail-current amplitudes were measured at  $-30$  mV after a 2,000-ms activating pulse from  $-60$  to  $+60$  mV. Currents were normalized to peak amplitude and fit with Boltzmann functions. Values for activation  $V_{1/2}$  were not significantly different between B6-Kv8.2 and SJL-Kv8.2.

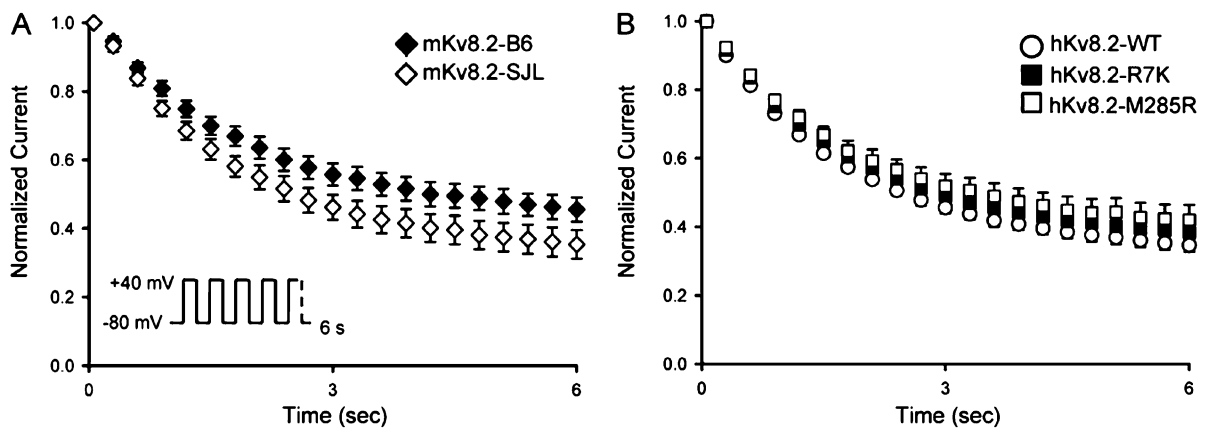

**Fig. S2.** Cumulative inactivation of Kv2.1 channels coexpressed with Kv8.2. Current was measured during a train of 100 depolarizing pulses to  $+40$  mV of 40-ms duration from a holding potential of  $-80$  mV at a frequency of 17 Hz. Currents were normalized to peak current amplitude. Plotted points correspond to means  $\pm$  SEM of every fifth pulse for mouse (A) and human (B) Kv8.2 subunits coexpressed with mouse and human Kv2.1, respectively. Cumulative inactivation kinetics were estimated by monoexponential decay fit to each cell recording and averaged. No significant differences were observed.

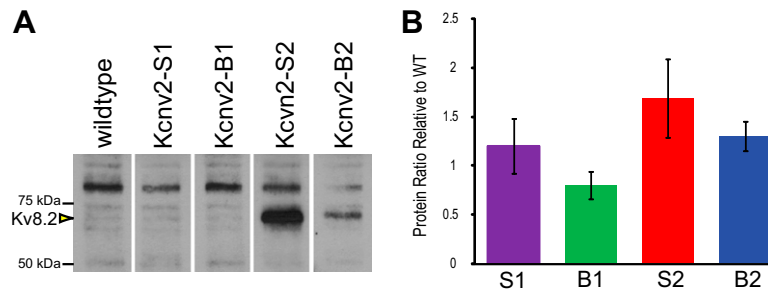

**Fig. S3.** Relative whole-brain expression of Kv8.2 protein in *Kcnv2* transgenic lines. (A) Representative immunoblot of Kv8.2 from *Kcnv2* transgenic mice and nontransgenic littermates (WT). Brain membrane proteins (25  $\mu$ g) were isolated at 6 wk of age and analyzed by immunoblotting with an affinity-purified rabbit polyclonal antiserum generated against the immunogenic peptide MLKQSNERRWLSY (ProSci Inc.). The predicted molecular weight of Kv8.2 is 64 kDa (arrowhead). Protein loading is indicated by relative intensity of the nonspecific immunoreactive band at  $\approx$ 80 kDa. All lanes are from the same exposure of a single blot. Isolation of membrane proteins and Western blotting was carried out as previously described (1). (B) Quantitative analysis of Kv8.2 relative protein levels normalized to the 80-kDa band ( $n \geq 3$  per genotype).

1. Kearney et al. (2002) Molecular and pathological effects of a modifier gene on deficiency of the sodium channel *Scn8a* (Na(v)1.6). *Hum Mol Genet* 11:2765–2775.

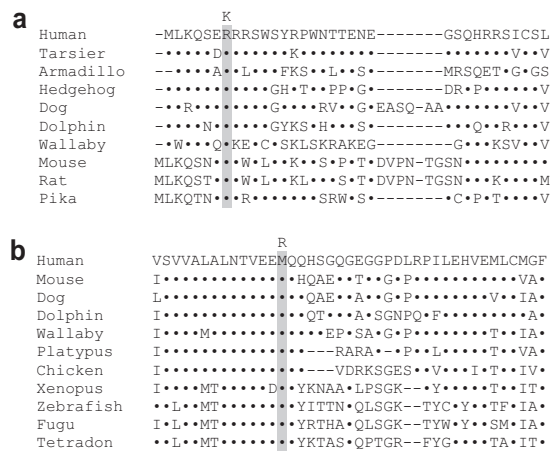

**Fig. S4.** Human *KCNV2* variants identified in epilepsy patients. (A) Evolutionary conservation of arginine 7. (B) Evolutionary conservation of methionine 285.

**Table S1.** *KCNV2* polymorphisms detected in screening of pediatric epilepsy patient samples

| SNP ID     | Position* (Mb) | Type   | Amino acid   | Major/minor alleles | Population minor allele frequency <sup>†</sup> | Flanking sequence         |
|------------|----------------|--------|--------------|---------------------|------------------------------------------------|---------------------------|
| rs11793555 | 2717629        | 5' UTR | -64 from AUG | G/T                 | 0.333                                          | CTAGAGGCAG(G/T)GAGCAGGTGA |
| rs7029012  | 2717698        | 5' UTR | -42 from AUG | C/G                 | 0.483                                          | GGACCCCTAC(C/G)ACAGCCAGGA |
| Unique     | 2717759        | Nonsyn | R7K          | G/A                 | NA                                             | CAGAGTGAGA(G/A)GAGACGGTCC |
| rs10967705 | 2717922        | Syn    | 61           | C/G                 | 0.459                                          | ACGAAGACGG(C/G)GAGGAGGAG  |
| rs10967709 | 2718498        | Syn    | 253          | A/G                 | 0.127                                          | TGGAGAAGCC(A/G)TTCTCCTCGG |
| rs12237048 | 2718534        | Syn    | 265          | C/G                 | 0.415                                          | TCGGGGTGGC(C/G)TCCAGCACCT |
| rs17656693 | 2718588        | Syn    | 283          | G/A                 | 0.009                                          | ACACCGTGGA(A/G)GAGATGCAGC |
| Unique     | 2718593        | Nonsyn | M285R        | T/G                 | NA                                             | GTGGAGGAGA(T/G)GAGCAGCAC  |
| rs7859993  | 2718654        | Syn    | 305          | G/A                 | 0.059                                          | TGGAGCACGT(G/A)GAGATGCTGT |
| rs7860945  | 2718717        | Syn    | 326          | C/T                 | 0.042                                          | CCACGCCGA(C/T)CTGAGGCGCT  |
| rs41312842 | 2729475        | Syn    | 462          | C/T                 | 0.097                                          | GCTACGGAGA(C/T)ATGTACCCAG |
| rs12352254 | 2729686        | Nonsyn | L533V        | C/G                 | 0.12                                           | TGAGTGTGG(C/G)TTGGAAGCAA  |
| rs41306094 | 2729733        | 3' UTR | +6 from stop | C/T                 | 0.097                                          | ATTAGTATT(T/C)ATAGGACATG  |

Patient DNAs ( $n = 209$ ) were screened for *KCNV2* variants by exon amplification, heteroduplex analysis, and sequencing. Two unique, nonsynonymous variants were identified (as noted) in unrelated patients and were subject to biophysical characterization. Nonsyn, nonsynonymous; NA, not available; Syn, synonymous.

\*Position is based on the human GRCh37 assembly.

<sup>†</sup>Population minor allele frequencies are from dbSNP reports.

**Table S2. Clinical features of epilepsy patients with unique, nonsynonymous *KCNV2* coding variants**

| Patient | Seizure types                  | Age of onset | EEG                                                    | MRI                              | Treatment                                                    | Family history | <i>KCNV2</i> variant* | Inherited? |
|---------|--------------------------------|--------------|--------------------------------------------------------|----------------------------------|--------------------------------------------------------------|----------------|-----------------------|------------|
| 1       | Partial, febrile and afebrile  | 2 y          | Right temporal epileptiform discharges                 | Right temporal T2 signal changes | Spontaneous remission: seizure-free at age 10 y with no AEDs | Yes            | R7K c.20G > A         | Yes        |
| 2       | Generalized, myoclonic, atonic | 2 y          | Right centrotemporal spikes; generalized abnormalities | NA                               | Corpus callosotomy; incomplete control with 3 AEDs           | No             | M285R c.854T > G      | Yes        |

AEDs, antiepileptic drugs; NA, not available.

\*GenBank accession no. BC10135.

**Table S3. *SCN1A* and *SCN2A* SNPs in patients with *KCNV2* variants**

| Gene         | Patient | SNP ID                 | SNP function  | cDNA position    | Amino acid | Patient genotype | Heterozygote frequency* |
|--------------|---------|------------------------|---------------|------------------|------------|------------------|-------------------------|
| <i>SCN1A</i> | 1       | rs994399 <sup>†</sup>  | Intronic      | c.965–21C > T    |            | T/T              | 0.6                     |
|              |         | rs9333574              | Intronic      | c.1171–9_10delTT |            | ΔTT/ΔTT          | 0.04 <sup>‡</sup>       |
|              |         | rs7580482 <sup>†</sup> | Synonymous    | c.1212A > G      | V404       | G/G              | 0.4                     |
|              |         | rs6432860 <sup>†</sup> | Synonymous    | c.2292T > C      | V764       | C/C              | 0.3                     |
|              |         | rs2126152 <sup>†</sup> | Intronic      | c.2416–37A > C   |            | C/C              | 0.3                     |
|              | 2       | rs2298771 <sup>†</sup> | Nonsynonymous | c.3199A > G      | A1067T     | A/A              | 0.3                     |
|              |         | rs61741123             | Synonymous    | c.345T > C       | N115       | T/C              | 0.2                     |
|              |         | rs994399 <sup>†</sup>  | Intronic      | c.965–21C > T    |            | C/T              | 0.6                     |
|              |         | rs1542484              | Intronic      | c.1028+21T > C   |            | T/C              | 0.5                     |
|              |         | rs7580482 <sup>†</sup> | Synonymous    | c.1212A > G      | V404       | A/G              | 0.4                     |
|              |         | rs7559148              | Intronic      | c.1662+9C > A    |            | C/A              | 0.2                     |
|              |         | rs6432860 <sup>†</sup> | Synonymous    | c.2292T > C      | V764       | C/C              | 0.3                     |
|              |         | rs2126152 <sup>†</sup> | Intronic      | c.2416–37A > C   |            | C/C              | 0.3                     |
|              |         | rs2298771 <sup>†</sup> | Nonsynonymous | c.3199A > G      | A1067T     | A/A              | 0.3                     |
| <i>SCN2A</i> | 1       | rs67198220             | Intronic      | c.3399–74+>insG  |            | -/G              | 0.015                   |
|              |         | rs1864885              | Intronic      | c.4211–31A > G   |            | G/A              | 0.3                     |
|              | 2       | Unique                 | Intronic      | c.385+46C > A    |            | C/A              | 0.004                   |
|              |         | rs67198220             | Intronic      | c.3399–74+>insG  |            | -/G              | 0.015                   |
|              |         | Unique                 | Synonymous    | c.5326C > T      | L1776      | C/T              | NA                      |

Patients 1 and 2 were screened for *SCN1A* and *SCN2A* mutations by amplification and sequencing of the coding exons. No pathogenic variants were identified. Patient 1 is homozygous for the most common *SCN1A* haplotype (T,G,C,C,A), whereas patient 2 is heterozygous for a rare haplotype (C,A,C,C,A) (1). NA, not available.

\*Heterozygote frequencies are from dbSNP reports unless otherwise noted.

<sup>†</sup>One of five SNPs that define *SCN1A* haplotypes.

<sup>‡</sup>Heterozygote frequency from Escayg et al. (2001) A novel *SCN1A* mutation associated with generalized epilepsy with febrile seizures plus—and prevalence of variants in patients with epilepsy. *Am J Hum Genet* 68:866–873.

1. Weiss LA, et al. (2003) Sodium channels *SCN1A*, *SCN2A* and *SCN3A* in familial autism. *Mol Psychiatry* 8:186–194.
